# Supplementary material
Source: PubMed Central journal article supplement (PMC8205813)
Supplement: ajtr0013-4281-f7.pdf [file ajtr0013-4281-f7.pdf]

## Novel mutations in sporadic and family TAAD

**Table S1.** TAAD-related Gene list

| TAAD-related Genes |           |         |          |          |          |          |         |        |          |
|--------------------|-----------|---------|----------|----------|----------|----------|---------|--------|----------|
| ACTA2              | GATA5     | PTPN22  | TGFBR1   | ARFGEF2  | COL1A1   | ERMARD   | HGD     | MED12  | POR      |
| FBN1               | LOX       | SLC2A10 | TGFBR2   | B3GAT3   | COL5A1   | FBLN5    | HLA-B   | MYH3   | PRDM16   |
| COL3A1             | MFAP5     | SMAD3   | BGN      | BCR      | COL5A2   | FBN2     | IFIH1   | MYPN   | PTEN     |
| ELN                | MYH11     | SMAD4   | PLOD1    | C12orf57 | CYP11B1  | FLNA     | IL12B   | NEDD4L | RERE     |
| ENG                | MYLK      | SMAD6   | ADAR     | CHD7     | CYP17A1  | FLNB     | KANSL1  | NOD2   | RIN2     |
| PRKG1              | NKX2-5    | TGFB2   | ALDH18A1 | CHRNA3   | DNMT3A   | FMR1     | KCNH1   | NSMCE2 | RNASEH2A |
| FOX3               | NOTCH1    | TGFB3   | ARF1     | CHST3    | EFEMP2   | GABRD    | LMNA    | PIGN   | RNASEH2B |
| RNASEH2C           | TAB2      | SMAD2   | HCN4     | TNXB     | SLC25A24 | ZMPSTE24 | EMILIN1 | CBS    | MAT2A    |
| ROBO4              | TMTC3     | TPM3    | SEMA3E   | ADAMTS-2 | TIMP3    | ARIH1    | LTBP1   | NOTCH2 | MSTN     |
| SAMHD1             | TPM2      | TREX1   | SKI      | COL4A5   | TIMP1    | COL1A2   | LTBP3   | NOTCH3 | *        |
| BAV-related Genes  |           |         |          |          |          |          |         |        |          |
| JAG1               | COLLAGEN3 | AXIN1   | MSX1     | GLI1     | ELASTIN  | PDIA2    | NOS1    | VEGFC  | WNT4     |
| SNAI3              | MCTP2     | SOX9    | TBX5     | SLC35B2  | NFATC1   | VEGFB    | TEX26   | APC    | AXIN2    |
| ZNF236             | GATA4     | PAX6    | FLT1     | PIGF     | NOS3     | KCNJ2    | PTCH2   | PPP3CA | EGFR     |

\*Genetic analysis of both LAMA4 and SOS2 genes were performed only in patient TAAD0077.

**Table S2.** Multiple gene mutations identified in Sporadic TAAD

| ID       | Sex | Age | Disease | Hypertension | Gene   | variant                           | Type       | classification | Syndrome |
|----------|-----|-----|---------|--------------|--------|-----------------------------------|------------|----------------|----------|
| TAAD0001 | M   | 37  | AD      | N            | COL1A2 | c.3338A>T, p. Asp1113Val          | Missense   | VUS            | N        |
|          |     |     |         |              | SMAD3  | c.245G>A, p. Gly82Glu             | Missense   | VUS            |          |
| TAAD0004 | M   | 41  | AD      | Y            | GATA4  | c.487C>T, p. Pro163Ser            | Missense   | VUS            | N        |
|          |     |     |         |              | COL5A1 | c.1970C>T, p. Pro657Leu           | Missense   | VUS            |          |
| TAAD0006 | M   | 37  | AD      | Y            | FBN2   | c.6665C>T, p. Pro2222Leu          | Missense   | VUS            | N        |
|          |     |     |         |              | NOS3   | c.2984+4A>G                       | Splicing   | VUS            |          |
| TAAD0009 | M   | 46  | AD      | Y            | COL3A1 | c.3490G>T, p. Gly1164Trp          | Missense   | VUS            | N        |
|          |     |     |         |              | FLNB   | c.2183C>T, p. Pro728Leu           | Missense   | VUS            |          |
| TAAD0010 | M   | 53  | AD      | Y            | SMAD6  | c.919A>C, p. Asn307His            | Missense   | VUS            | N        |
|          |     |     |         |              | MED12  | c.2665C>G, p. Leu889Val           | Missense   | VUS            |          |
| TAAD0017 | F   | 74  | AD      | N            | MYH11  | c.5838_5839del, p. Arg1946SerfsX2 | Frameshift | LP             | N        |
|          |     |     |         |              | JAG1   | c.3286C>T, p. Arg1096Trp          | Missense   | VUS            |          |
| TAAD0030 | M   | 56  | AD      | Y            | COL5A2 | c.3884C>A, p. Thr1295Lys          | Missense   | VUS            | N        |
|          |     |     |         |              | HCN4   | c.995G>A, p. Arg332Gln            | Missense   | VUS            |          |
| TAAD0035 | M   | 43  | TAA+BAV | N            | COL1A1 | c.1072C>G, p. Gln358Glu           | Missense   | VUS            | N        |
|          |     |     |         |              | GATA4  | c.221C>A, p. Ala74Asp             | Missense   | VUS            |          |

### Novel mutations in sporadic and family TAAD

|          |   |          |         |   |        |                                |            |     |   |
|----------|---|----------|---------|---|--------|--------------------------------|------------|-----|---|
| TAAD0036 | M | 48       | AD      | Y | COL5A1 | c.5045T>G, p. Phe1682Cys       | Missense   | VUS | N |
|          |   |          |         |   | MYH11  | c.4786A>G, p. Arg1596Gly       | Missense   | VUS |   |
|          |   |          |         |   | PTCH2  | c.2483G>C, p. Gly828Ala        | Missense   | VUS |   |
| TAAD0037 | M | 38       | TAA+BAV | N | FBN2   | c.577C>T, p. Pro193Ser         | Missense   | VUS | N |
|          |   |          |         |   | FBN1   | c.7559C>T, p. Thr2520Met       | Missense   | VUS |   |
| TAAD0044 | M | 55       | AD      | Y | FLNA   | c.1484T>C, p. Val495Ala        | Missense   | VUS | N |
|          |   |          |         |   | MCTP2  | c.694_695del, p. Lys232SerfsX3 | Frameshift | VUS |   |
| TAAD0048 | M | 38       | AD      | Y | LOX    | c.433C>T, p. Gln145Ter         | Nonsense   | LP  | N |
|          |   |          |         |   | NOS3   | c.1399T>A, p. Tyr467Asn        | Missense   | VUS |   |
| TAAD0050 | M | 58       | AD      | N | FLNB   | c.6028C>T, p. Arg2010Cys       | Missense   | VUS | N |
|          |   |          |         |   | COL1A2 | c.1976A>G, p. Glu659Gly        | Missense   | VUS |   |
| TAAD0077 | M | 70       | AD      | Y | LAMA4  | c.307C>G, p. Arg103Gly         | Missense   | VUS | N |
|          |   |          |         |   | NOTCH2 | c.4666G>A, p. Glu1556Lys       | Missense   | VUS |   |
|          |   |          |         |   | PRDM16 | c.3623T>C, p. Val1208Ala       | Missense   | VUS |   |
|          |   |          |         |   | SOS2   | c.3027C>G, p. Asn1009Lys       | Missense   | VUS |   |
| TAAD0083 | M | 50       | AD      | N | NOTCH3 | c.709G>A, p.Val237Met          | Missense   | VUS | N |
|          |   |          |         |   | FBN1   | c.2860C>T, p.Arg954Cys         | Missense   | P   |   |
| TAAD0097 | M | 2 months | TAA     | N | B3GAT3 | c.47C>A, p.Ser16Ter            | Nonsense   | LP  | Y |
|          |   |          |         |   | B3GAT3 | c.752T>C, p.Val251Ala          | Missense   | VUS |   |
| TAAD0046 | M | 52       | AD      | N | TGFBR2 | c.1483C>T, p. Arg495Ter        | Nonsense   | P   | Y |
|          |   |          |         |   | APC    | c.1865A>G, p. Tyr622Cys        | Missense   | VUS |   |
|          |   |          |         |   | TEX26  | c.31C>T, p. Gln11Ter           | Nonsense   | VUS |   |

F: female; M: male; AD: aortic dissection; TAA: thoracic aortic aneurysm; BAV: bicuspid aortic valve; VUS: variant of uncertain significance; P: pathogenic; LP: likely pathogenic.

## Novel mutations in sporadic and family TAAD

**Table S3.** Multiple mutations of different genes in Familial TAAD

| ID              | Sex | Age | Disease | Hypertension | Gene   | Variant                  | Type     | Classification | Syndrome |
|-----------------|-----|-----|---------|--------------|--------|--------------------------|----------|----------------|----------|
| TAAD0047        | M   | 27  | AD      | Y            | FBN1   | c.1838-2A>G              | Splicing | LP             | Y        |
|                 |     |     |         |              | MSX1   | c.458C>A, p. Pro153Gln   | Missense | VUS            |          |
| <u>TAAD0075</u> | M   | 40  | AD      | N            | FBN1   | c.5797G>A, p. Glu1933Lys | Missense | VUS            | Y        |
|                 |     |     |         |              | BAG3   | c.317G>A, p. Arg106Gln   | Missense | VUS            |          |
| <u>TAAD0076</u> | F   | 42  | AD      | Y            | FBN1   | c.5797G>A, p. Glu1933Lys | Missense | VUS            | Y        |
|                 |     |     |         |              | BAG3   | c.317G>A, p. Arg106Gln   | Missense | VUS            |          |
| <u>TAAD0081</u> | M   | 31  | /       | N            | FBN1   | c.7113G>A, p. Trp2371Ter | Nonsense | LP             | Y        |
|                 |     |     |         |              | COL5A1 | c.526A>C, p. Asn176His   | Missense | VUS            |          |
|                 |     |     |         |              | MYH11  | c.33G>T, p. Glu11Asp     | Missense | VUS            |          |
| <u>TAAD0082</u> | M   | 27  | TAA     | N            | FBN1   | c.7113G>A, p. Trp2371Ter | Nonsense | LP             | Y        |
|                 |     |     |         |              | COL5A1 | c.526A>C, p. Asn176His   | Missense | VUS            |          |
|                 |     |     |         |              | MYH11  | c.33G>T, p. Glu11Asp     | Missense | VUS            |          |
| <u>TAAD0087</u> | F   | 43  | AD      | N            | FBN1   | c.6575G>T, p. Cys2192phe | Missense | LP             | Y        |
|                 |     |     |         |              | LOX    | c.218G>A, p. Gly73Asp    | Missense | VUS            |          |
| <u>TAAD0088</u> | F   | 41  | TAA     | N            | FBN1   | c.6575G>T, p. Cys2192Phe | Missense | LP             | Y        |
|                 |     |     |         |              | ELN    | c.1876G>A, p. Ala626Thr  | Missense | VUS            |          |

M: male; F: female; AD: aortic dissection; TAA: thoracic aortic aneurysm; LP: likely pathogenic; VUS: variant of uncertain significance. Three pairs of siblings from three unrelated families were underlined.
